# Supplementary material
Source: publisher site journal article supplement (https://www.dovepress.com/article/544568)
Supplement: Supplementary file 1 [file 544568%20Revised%20Supplementary%20material.docx]

**Supplementary material**s

**Table S1** Comparison of clinical efficacy and psychological outcome of systemic therapy in different disease duration at 3 months

| Outcomes | Response rate | Unadjusted  *OR (95% CI)* | *P*-value | Adjusted  *OR (95% CI)* | *P*-value |
| --- | --- | --- | --- | --- | --- |
| **BSA＜1** |  |  |  |  |  |
| ＜15 years | 32% |  |  |  |  |
| ≥ 15 years | 33% | 1.05(0.76,1.45) | 0.77 | 0.85(0.53,1.36) | 0.50 |
| **BSA＜3** |  |  |  |  |  |
| ＜15 years | 53% |  |  |  |  |
| ≥ 15 years | 50% | 0.88(0.65,1.19) | 0.40 | 0.61(0.39,0.95) | 0.03 |
| **PGA 0/1** |  |  |  |  |  |
| ＜15 years | 55% |  |  |  |  |
| ≥ 15 years | 61% | 1.29(0.94,1.75) | 0.11 | 1.13(0.74,1.72) | 0.57 |
| **PASI 75** |  |  |  |  |  |
| ＜15 years | 58% |  |  |  |  |
| ≥ 15 years | 61% | 1.12(0.82,1.53) | 0.48 | 0.70(0.44,1.10) | 0.12 |
| **DLQI 0/1** |  |  |  |  |  |
| ＜15 years | 37% |  |  |  |  |
| ≥ 15 years | 44% | 1.37(1.00,1.87) | 0.049 | 1.01(0.67,1.52) | 0.97 |
| **PtGA 0/1** |  |  |  |  |  |
| ＜15 years | 24% |  |  |  |  |
| ≥ 15 years | 28% | 1.23(0.86,1.77) | 0.26 | 1.22(0.74,2.00) | 0.43 |
| **HADS-A=0** |  |  |  |  |  |
| ＜15 years | 35% |  |  |  |  |
| ≥ 15 years | 37% | 1.09(0.69,1.72) | 0.72 | 0.71(0.38,1.32) | 0.28 |
| **HADS-D=0** |  |  |  |  |  |
| ＜15 years | 23% |  |  |  |  |
| ≥ 15 years | 31% | 1.45(0.88,2.40) | 0.14 | 1.31(0.67,2.57) | 0.44 |

**Abbreviations:** OR = Odds Ratio, CI = Confidence Interval; BSA, Body Surface Area; PGA, Physician's Global Assessment; PASI, Psoriasis Area and Severity Index; DLQI, Dermatology Life Quality Index; PtGA, Patient Global Assessment; HADS-A, Hospital Anxiety and Depression-Anxiety; HADS-D, Hospital Anxiety and Depression-Depression.

**Table S2** Compare of clinical efficacy and psychological outcome of systemic therapy in different disease duration at 6 months

| Outcomes | Response rate | Unadjusted  *OR (95% CI)* | *P*-value | Adjusted  *OR (95% CI)* | *P*-value |
| --- | --- | --- | --- | --- | --- |
| **BSA＜1** |  |  |  |  |  |
| ＜15 years | 49% |  |  |  |  |
| ≥ 15 years | 49% | 1.01(0.66,1.54) | 0.97 | 0.31(0.73,2.35) | 0.37 |
| **BSA＜3** |  |  |  |  |  |
| ＜15 years | 68% |  |  |  |  |
| ≥ 15 years | 66% | 0.93(0.60,1.47) | 0.77 | 1.20(0.63,2.29) | 0.57 |
| **PGA 0/1** |  |  |  |  |  |
| ＜15 years | 63% |  |  |  |  |
| ≥ 15 years | 57% | 0.79(0.50,1.22) | 0.29 | 0.71(0.38,1.31) | 0.27 |
| **PASI 75** |  |  |  |  |  |
| ＜15 years | 73% |  |  |  |  |
| ≥ 15 years | 74% | 1.04(0.64,1.67) | 0.88 | 0.97(0.50,1.90) | 0.93 |
| **DLQI 0/1** |  |  |  |  |  |
| ＜15 years | 49% |  |  |  |  |
| ≥ 15 years | 53% | 1.17(0.75,1.81) | 0.48 | 0.93(0.52,1.67) | 0.82 |
| **PtGA 0/1** |  |  |  |  |  |
| ＜15 years | 35% |  |  |  |  |
| ≥ 15 years | 45% | 1.55(0.97,2.47) | 0.067 | 1.84(0.96,3.55) | 0.068 |
| **HADS-A=0** |  |  |  |  |  |
| ＜15 years | 34% |  |  |  |  |
| ≥ 15 years | 47% | 1.70(1.05,2.75) | 0.032 | 2.15(1.13,4.08) | 0.019 |
| **HADS-D=0** |  |  |  |  |  |
| ＜15 years | 25% |  |  |  |  |
| ≥ 15 years | 34% | 1.57(0.94,2.64) | 0.087 | 1.67(0.84,3.29) | 0.14 |

**Abbreviations:** OR = Odds Ratio, CI = Confidence Interval; BSA, Body Surface Area; PGA, Physician's Global Assessment; PASI, Psoriasis Area and Severity Index; DLQI, Dermatology Life Quality Index; PtGA, Patient Global Assessment; HADS-A, Hospital Anxiety and Depression-Anxiety; HADS-D, Hospital Anxiety and Depression-Depression.

**Table S3.** Hierarchical Analysis of PASI75 Response by Disease Duration and Treatment Type

| Time Point | Stratum | *OR (95% CI)* | *p*-value | Homogeneity (Breslow-Day) *p* |
| --- | --- | --- | --- | --- |
| Month 3 | Biologics | 1.26 (0.98–1.62) | 0.07 | 0.593 |
| Traditional agents | 1.17 (0.95–1.44) | 0.14 | 0.593 |
| Overall (CMH) | 1.21 (0.99–1.49) | 0.064 | — |
| Month 6 | Biologics | 1.18 (0.94–1.48) | 0.12 | 0.727 |
| Traditional agents | 1.12 (0.91–1.38) | 0.28 | 0.727 |
| Overall (CMH) | 1.15 (0.94–1.42) | 0.179 | — |

**Abbreviations:** Hierarchical analysis of PASI75 response according to disease duration and treatment type at Months 3 and 6. OR: odds ratio; CI: confidence interval; CMH: Cochran-Mantel-Haenszel pooled OR. Homogeneity test (Breslow-Day) p-value assesses whether stratum-specific ORs are consistent.

**Table S4.** Hierarchical Analysis of PASI75 Response by Disease Duration and Prior Systemic Therapy

| Time Point | Prior Systemic Therapy | OR (95% CI) | p-value | Homogeneity (Breslow-Day) p |
| --- | --- | --- | --- | --- |
| Month 3 | No | 1.23 (0.99–1.53) | 0.065 | 0.577 |
| Yes | 1.18 (0.96–1.45) | 0.12 | 0.577 |
| Overall (CMH) | 1.21 (0.998–1.455) | 0.052 | — |
| Month 6 | No | 1.15 (0.92–1.42) | 0.18 | 0.436 |
| Yes | 1.20 (0.98–1.47) | 0.078 | 0.436 |
| Overall (CMH) | 1.20 (0.98–1.47) | 0.078 | — |

**Abbreviations:** Hierarchical analysis of PASI75 response according to disease duration and prior systemic therapy at Months 3 and 6. OR: odds ratio; CI: confidence interval; CMH: Cochran-Mantel-Haenszel pooled OR. Homogeneity test (Breslow-Day) p-value assesses whether stratum-specific ORs are consistent.


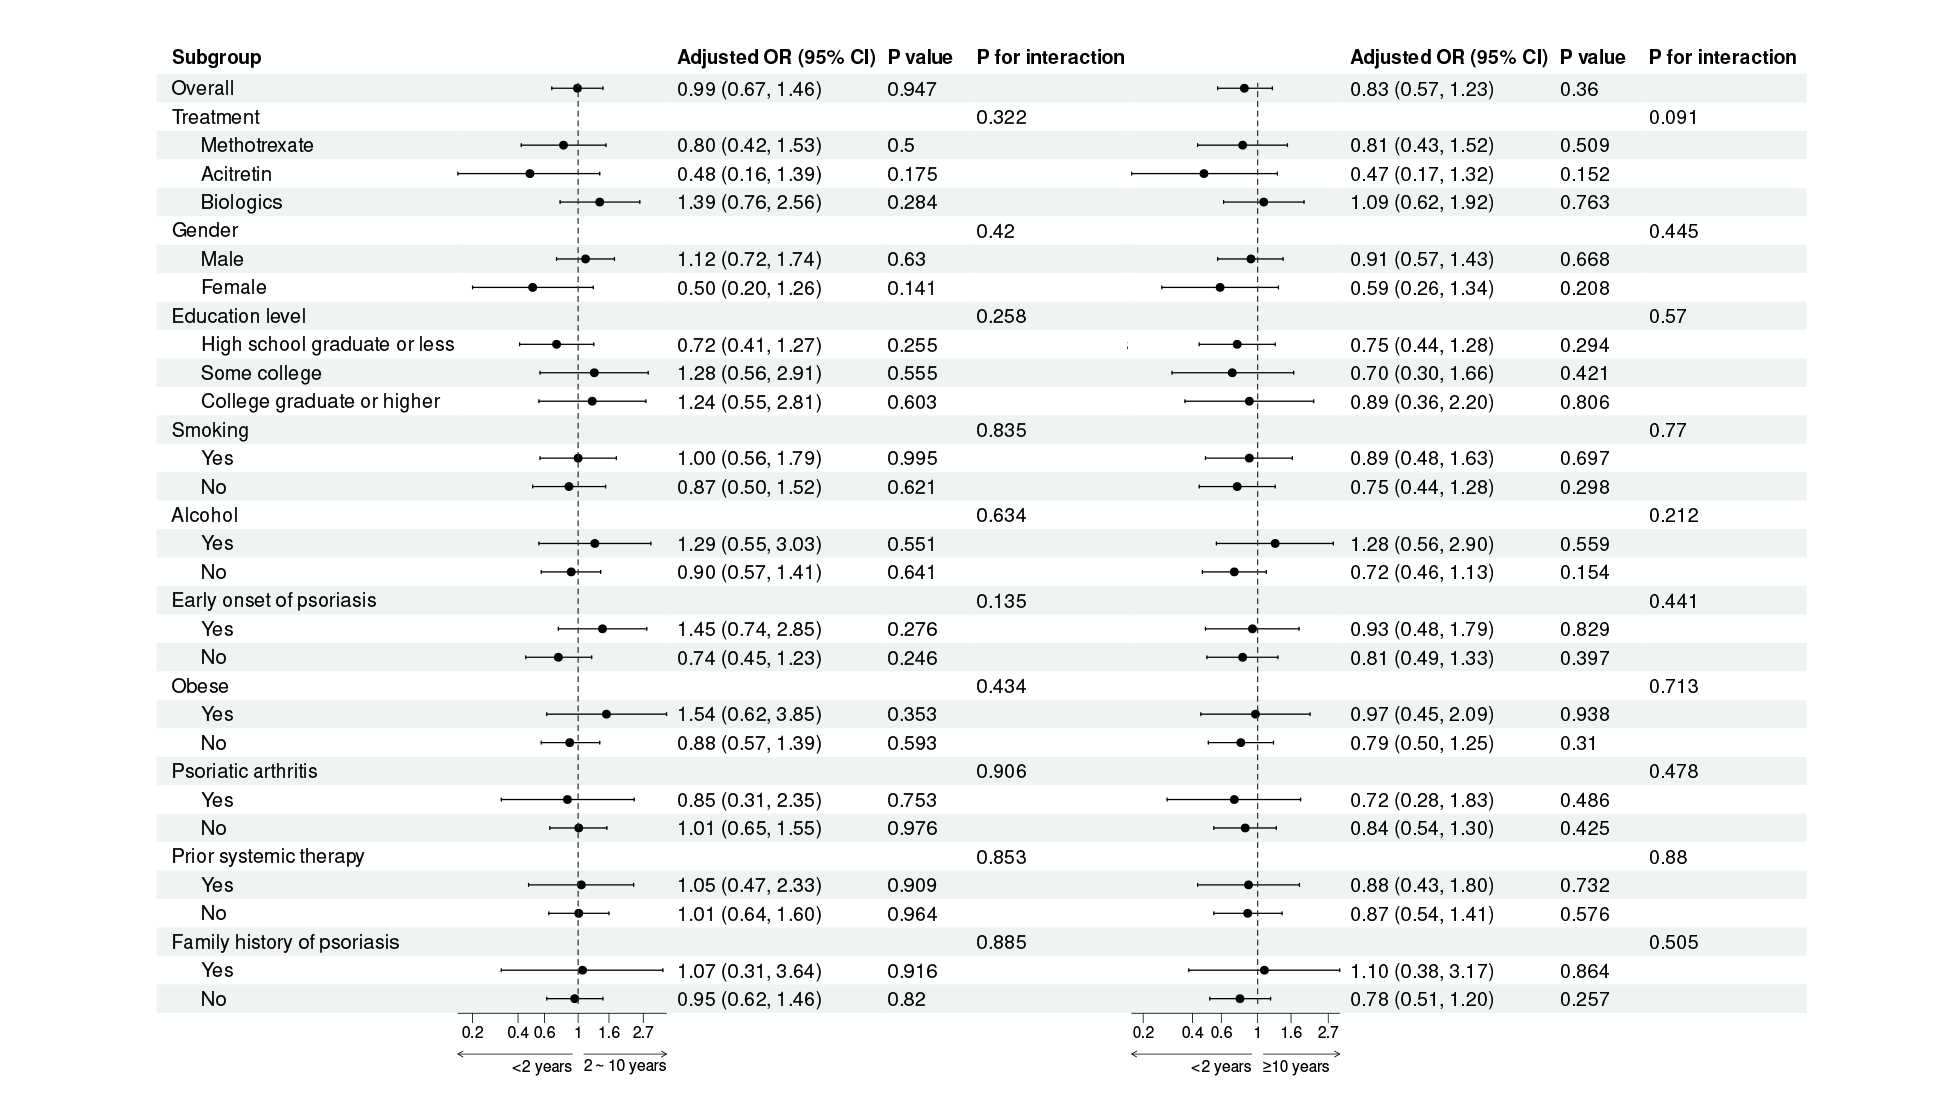
**Figure S1** Effect of disease duration on PASI75 at 3 months: subgroup analysis. PASI75, 75% improvement in PASI from baseline.


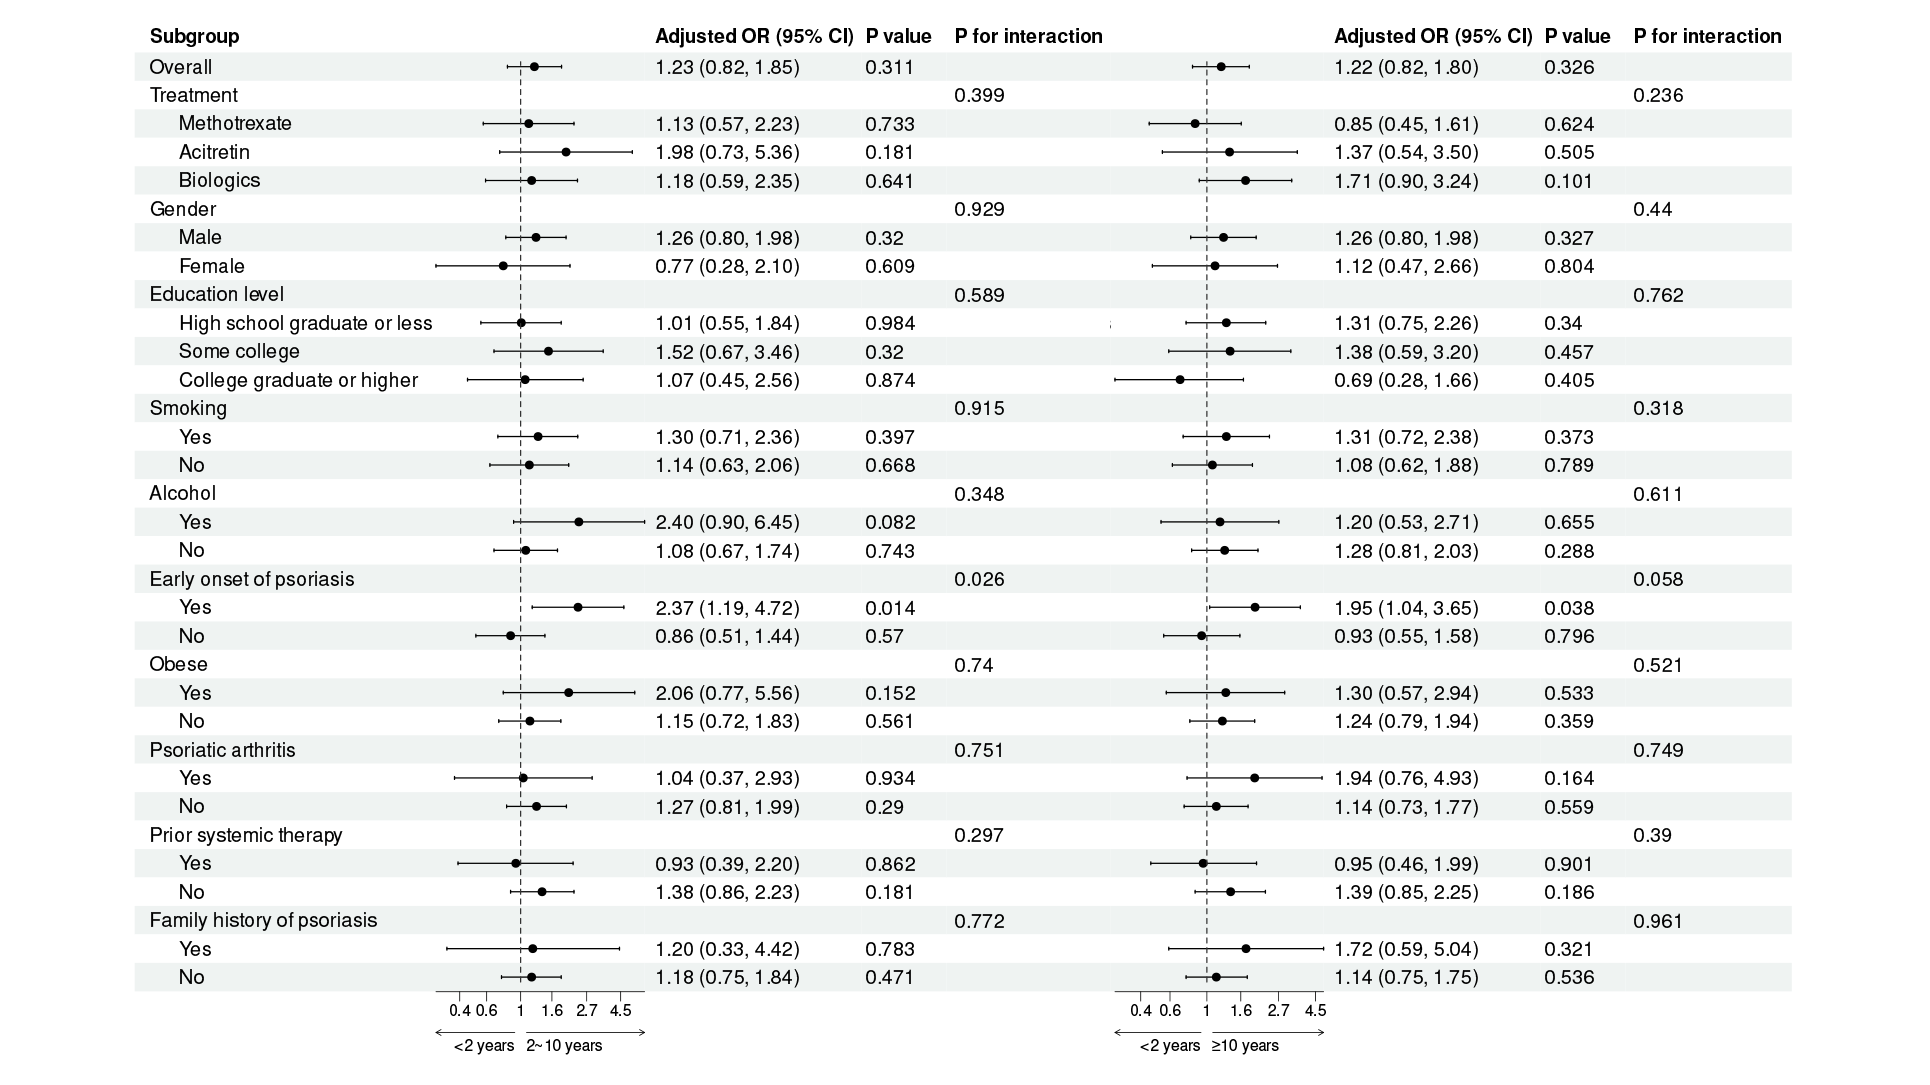
**Figure S2** Effect of disease duration on PASI75 at 6 months: Subgroup analysis. PASI75, 75% improvement in PASI from baseline.
